# Supplementary material for: Brain Activity and Functional Connectivity Associated with Hypnosis
Source: Oxford University Press journal article supplement (doi:10.1093/cercor/bhw220), 2016-07-28
Supplement: supplementarytables1.docx [file supplementarytables1.docx]

**Table S1: Scan Statistics for Movement and Physiological Recordings across Group and Condition**

|  | **Condition** | **High (36)** | **High (21)** | **Low (21)** |
| --- | --- | --- | --- | --- |
| **Movement (RMS, mm)** | Rest | 0.19 ± 0.11 | 0.21 ± 0.11 | 0.17 ± 0.13 |
|  | Hypnosis (vacation) | 0.19 ± 0.15 | 0.21 ± 0.17 | 0.18 ± 0.14 |
|  | Hypnosis (happy) | 0.18 ± 0.13 | 0.21 ± 0.15 | 0.19 ± 0.16 |
|  | Memory | 0.22 ± 0.18 | 0.22 ± 0.15 | 0.13 ± 0.09 |
| **Heart Rate (BPM)** | Rest | 67.7 ± 11.2 | 68.2 ± 10.5 | 71.5 ± 9.7 |
|  | Hypnosis (vacation) | 66.6 ± 11.5 | 68.3 ± 9.3 | 70.9 ± 8.2 |
|  | Hypnosis (happy) | 68.8 ± 11.5 | 69.2 ± 10.6 | 69.8 ± 8.5 |
|  | Memory | 69.4 ± 12.6 | 70.0 ± 10.2 | 71.7 ± 9.2 |
| **Respiration Rate (BPM)** | Rest | 15.6 ± 4.3 | 15.6 ± 3.4 | 15.8 ± 3.6 |
|  | Hypnosis (vacation) | 14.8 ± 4.1 | 15.3 ± 3.3 | 15.3 ± 4.0 |
|  | Hypnosis (happy) | 15.2 ± 4.3 | 15.4 ± 3.8 | 14.5 ± 4.5 |
|  | Memory | 17.0 ± 3.5 | 17.1 ± 3.2 | 17.1 ± 3.6 |
